# Supplementary material
Source: Research Square preprint supplement (doi:10.21203/rs.3.rs-8962575/v1)
Supplement: Supplementary file 1 [file 7f8a349bcad7b9d1c7e9ce49.xlsx]

## Sheet: Title
Supplementary Information (including Supplementary Tables 1–2)
Benchmarking Locally Deployed Open-Weight Vision–Language Models on the Japanese National Examination for Pharmacists
Hiroto Asano1, Yu-Shi Tian1*, Asuka Hatabu1, Minako Ohishi1, Kaori Fukuzawa1, Daisuke Takaya1, Kenji Ikeda1
1Graduate School of Pharmaceutical Sciences, The University of Osaka, 1-6 Yamadaoka, Suita, Osaka 565-0871, Japan
* Corresponding author:
Yu-Shi Tian
Graduate School of Pharmaceutical Sciences, The University of Osaka
1-6 Yamadaoka, Suita City, Osaka 565-0871, Japan
Phone No: +81-6-6879-8242
Fax No: +81-6-6879-8242
Email Address: yushi-tian@phs.osaka-u.ac.jp

## Sheet: Table S1
Table S1. Overall performance of open-weight vision–language models across three independent trials on the JNEP.
Model	Trial	Total Number of Questions	Number of Correct Responses	Number of Incorrect Responses	Accuracy (%)	Mean Accuracy Across Three Trials (%)	Standard Deviation of Accuracy (%)
bakllava:7b	1	345	12	333	3.48	4.35	1.26
bakllava:7b	2	345	13	332	3.77	4.35	1.26
bakllava:7b	3	345	20	325	5.8	4.35	1.26
devstral-small-2:24b	1	345	191	154	55.36	55.07	0.29
devstral-small-2:24b	2	345	189	156	54.78	55.07	0.29
devstral-small-2:24b	3	345	190	155	55.07	55.07	0.29
gemma3:12b	1	345	177	168	51.3	50.15	1
gemma3:12b	2	345	171	174	49.57	50.15	1
gemma3:12b	3	345	171	174	49.57	50.15	1
gemma3:27b	1	345	170	175	49.28	49.18	0.17
gemma3:27b	2	345	170	175	49.28	49.18	0.17
gemma3:27b	3	345	169	176	48.99	49.18	0.17
gemma3:4b	1	345	76	269	22.03	21.93	1.6
gemma3:4b	2	345	70	275	20.29	21.93	1.6
gemma3:4b	3	345	81	264	23.48	21.93	1.6
granite3.2-vision:2b	1	345	43	302	12.46	11.88	0.5
granite3.2-vision:2b	2	345	40	305	11.59	11.88	0.5
granite3.2-vision:2b	3	345	40	305	11.59	11.88	0.5
llama3.2-vision:11b	1	345	30	315	8.7	8.51	0.17
llama3.2-vision:11b	2	345	29	316	8.41	8.51	0.17
llama3.2-vision:11b	3	345	29	316	8.41	8.51	0.17
llama3.2-vision:90b	1	345	188	157	54.49	53.81	0.6
llama3.2-vision:90b	2	345	185	160	53.62	53.81	0.6
llama3.2-vision:90b	3	345	184	161	53.33	53.81	0.6
llama4:16x17b	1	345	208	137	60.29	60.39	0.44
llama4:16x17b	2	345	207	138	60	60.39	0.44
llama4:16x17b	3	345	210	135	60.87	60.39	0.44
llava-llama3:8b	1	345	21	324	6.09	6.96	0.77
llava-llama3:8b	2	345	25	320	7.25	6.96	0.77
llava-llama3:8b	3	345	26	319	7.54	6.96	0.77
llava-phi3:3.8b	1	345	29	316	8.41	8.51	0.44
llava-phi3:3.8b	2	345	31	314	8.99	8.51	0.44
llava-phi3:3.8b	3	345	28	317	8.12	8.51	0.44
llava:13b	1	345	40	305	11.59	11.4	1.17
llava:13b	2	345	35	310	10.14	11.4	1.17
llava:13b	3	345	43	302	12.46	11.4	1.17
llava:7b	1	345	29	316	8.41	7.73	0.93
llava:7b	2	345	23	322	6.67	7.73	0.93
llava:7b	3	345	28	317	8.12	7.73	0.93
ministral-3:14b	1	345	185	160	53.62	54.01	0.33
ministral-3:14b	2	345	187	158	54.2	54.01	0.33
ministral-3:14b	3	345	187	158	54.2	54.01	0.33
ministral-3:3b	1	345	127	218	36.81	36.71	0.44
ministral-3:3b	2	345	125	220	36.23	36.71	0.44
ministral-3:3b	3	345	128	217	37.1	36.71	0.44
ministral-3:8b	1	345	152	193	44.06	43.96	0.17
ministral-3:8b	2	345	151	194	43.77	43.96	0.17
ministral-3:8b	3	345	152	193	44.06	43.96	0.17
mistral-small3.1:24b	1	345	202	143	58.55	56.13	2.14
mistral-small3.1:24b	2	345	188	157	54.49	56.13	2.14
mistral-small3.1:24b	3	345	191	154	55.36	56.13	2.14
mistral-small3.2:24b	1	345	202	143	58.55	57.87	0.6
mistral-small3.2:24b	2	345	198	147	57.39	57.87	0.6
mistral-small3.2:24b	3	345	199	146	57.68	57.87	0.6
moondream:1.8b	1	345	2	343	0.58	0.68	0.17
moondream:1.8b	2	345	2	343	0.58	0.68	0.17
moondream:1.8b	3	345	3	342	0.87	0.68	0.17
qwen2.5vl:32b	1	345	184	161	53.33	52.56	1.34
qwen2.5vl:32b	2	345	184	161	53.33	52.56	1.34
qwen2.5vl:32b	3	345	176	169	51.01	52.56	1.34
qwen2.5vl:3b	1	345	63	282	18.26	19.13	0.87
qwen2.5vl:3b	2	345	69	276	20	19.13	0.87
qwen2.5vl:3b	3	345	66	279	19.13	19.13	0.87
qwen2.5vl:72b	1	345	215	130	62.32	62.13	0.17
qwen2.5vl:72b	2	345	214	131	62.03	62.13	0.17
qwen2.5vl:72b	3	345	214	131	62.03	62.13	0.17
qwen2.5vl:7b	1	345	88	257	25.51	26.09	1.26
qwen2.5vl:7b	2	345	87	258	25.22	26.09	1.26
qwen2.5vl:7b	3	345	95	250	27.54	26.09	1.26
translategemma:12b	1	345	155	190	44.93	44.35	0.77
translategemma:12b	2	345	150	195	43.48	44.35	0.77
translategemma:12b	3	345	154	191	44.64	44.35	0.77
translategemma:27b	1	345	170	175	49.28	51.01	1.53
translategemma:27b	2	345	180	165	52.17	51.01	1.53
translategemma:27b	3	345	178	167	51.59	51.01	1.53
translategemma:4b	1	345	71	274	20.58	20.58	0.29
translategemma:4b	2	345	70	275	20.29	20.58	0.29
translategemma:4b	3	345	72	273	20.87	20.58	0.29

## Sheet: Table S2
Table S2. Category-wise performance of open-weight vision–language models across three independent trials on the JNEP.
Model	Subject	Trial	Total Number of Questions	Number of Correct Responses	Number of Incorrect Responses	Accuracy (%)
bakllava:7b	Biology	1	25	2	23	8
bakllava:7b	Biology	2	25	1	24	4
bakllava:7b	Biology	3	25	2	23	8
bakllava:7b	Chemistry	1	25	1	24	4
bakllava:7b	Chemistry	2	25	1	24	4
bakllava:7b	Chemistry	3	25	3	22	12
bakllava:7b	Hygiene	1	50	2	48	4
bakllava:7b	Hygiene	2	50	1	49	2
bakllava:7b	Hygiene	3	50	4	46	8
bakllava:7b	Laws/Regulations/Ethics	1	40	1	39	2.5
bakllava:7b	Laws/Regulations/Ethics	2	40	1	39	2.5
bakllava:7b	Laws/Regulations/Ethics	3	40	2	38	5
bakllava:7b	Pathophysiology/Drug Therapy	1	50	1	49	2
bakllava:7b	Pathophysiology/Drug Therapy	2	50	3	47	6
bakllava:7b	Pathophysiology/Drug Therapy	3	50	1	49	2
bakllava:7b	Pharmaceutics	1	50	0	50	0
bakllava:7b	Pharmaceutics	2	50	0	50	0
bakllava:7b	Pharmaceutics	3	50	2	48	4
bakllava:7b	Pharmacology	1	50	4	46	8
bakllava:7b	Pharmacology	2	50	3	47	6
bakllava:7b	Pharmacology	3	50	2	48	4
bakllava:7b	Physics	1	25	0	25	0
bakllava:7b	Physics	2	25	1	24	4
bakllava:7b	Physics	3	25	1	24	4
bakllava:7b	Practice	1	30	1	29	3.33
bakllava:7b	Practice	2	30	2	28	6.67
bakllava:7b	Practice	3	30	3	27	10
devstral-small-2:24b	Biology	1	25	13	12	52
devstral-small-2:24b	Biology	2	25	13	12	52
devstral-small-2:24b	Biology	3	25	13	12	52
devstral-small-2:24b	Chemistry	1	25	9	16	36
devstral-small-2:24b	Chemistry	2	25	10	15	40
devstral-small-2:24b	Chemistry	3	25	10	15	40
devstral-small-2:24b	Hygiene	1	50	29	21	58
devstral-small-2:24b	Hygiene	2	50	29	21	58
devstral-small-2:24b	Hygiene	3	50	28	22	56
devstral-small-2:24b	Laws/Regulations/Ethics	1	40	18	22	45
devstral-small-2:24b	Laws/Regulations/Ethics	2	40	18	22	45
devstral-small-2:24b	Laws/Regulations/Ethics	3	40	17	23	42.5
devstral-small-2:24b	Pathophysiology/Drug Therapy	1	50	36	14	72
devstral-small-2:24b	Pathophysiology/Drug Therapy	2	50	36	14	72
devstral-small-2:24b	Pathophysiology/Drug Therapy	3	50	37	13	74
devstral-small-2:24b	Pharmaceutics	1	50	25	25	50
devstral-small-2:24b	Pharmaceutics	2	50	24	26	48
devstral-small-2:24b	Pharmaceutics	3	50	26	24	52
devstral-small-2:24b	Pharmacology	1	50	36	14	72
devstral-small-2:24b	Pharmacology	2	50	34	16	68
devstral-small-2:24b	Pharmacology	3	50	36	14	72
devstral-small-2:24b	Physics	1	25	8	17	32
devstral-small-2:24b	Physics	2	25	8	17	32
devstral-small-2:24b	Physics	3	25	8	17	32
devstral-small-2:24b	Practice	1	30	17	13	56.67
devstral-small-2:24b	Practice	2	30	17	13	56.67
devstral-small-2:24b	Practice	3	30	15	15	50
gemma3:12b	Biology	1	25	13	12	52
gemma3:12b	Biology	2	25	13	12	52
gemma3:12b	Biology	3	25	12	13	48
gemma3:12b	Chemistry	1	25	8	17	32
gemma3:12b	Chemistry	2	25	8	17	32
gemma3:12b	Chemistry	3	25	6	19	24
gemma3:12b	Hygiene	1	50	28	22	56
gemma3:12b	Hygiene	2	50	28	22	56
gemma3:12b	Hygiene	3	50	29	21	58
gemma3:12b	Laws/Regulations/Ethics	1	40	21	19	52.5
gemma3:12b	Laws/Regulations/Ethics	2	40	21	19	52.5
gemma3:12b	Laws/Regulations/Ethics	3	40	20	20	50
gemma3:12b	Pathophysiology/Drug Therapy	1	50	32	18	64
gemma3:12b	Pathophysiology/Drug Therapy	2	50	30	20	60
gemma3:12b	Pathophysiology/Drug Therapy	3	50	30	20	60
gemma3:12b	Pharmaceutics	1	50	25	25	50
gemma3:12b	Pharmaceutics	2	50	23	27	46
gemma3:12b	Pharmaceutics	3	50	25	25	50
gemma3:12b	Pharmacology	1	50	26	24	52
gemma3:12b	Pharmacology	2	50	25	25	50
gemma3:12b	Pharmacology	3	50	27	23	54
gemma3:12b	Physics	1	25	8	17	32
gemma3:12b	Physics	2	25	6	19	24
gemma3:12b	Physics	3	25	6	19	24
gemma3:12b	Practice	1	30	16	14	53.33
gemma3:12b	Practice	2	30	17	13	56.67
gemma3:12b	Practice	3	30	16	14	53.33
gemma3:27b	Biology	1	25	17	8	68
gemma3:27b	Biology	2	25	18	7	72
gemma3:27b	Biology	3	25	17	8	68
gemma3:27b	Chemistry	1	25	7	18	28
gemma3:27b	Chemistry	2	25	7	18	28
gemma3:27b	Chemistry	3	25	6	19	24
gemma3:27b	Hygiene	1	50	33	17	66
gemma3:27b	Hygiene	2	50	32	18	64
gemma3:27b	Hygiene	3	50	33	17	66
gemma3:27b	Laws/Regulations/Ethics	1	40	15	25	37.5
gemma3:27b	Laws/Regulations/Ethics	2	40	15	25	37.5
gemma3:27b	Laws/Regulations/Ethics	3	40	14	26	35
gemma3:27b	Pathophysiology/Drug Therapy	1	50	31	19	62
gemma3:27b	Pathophysiology/Drug Therapy	2	50	31	19	62
gemma3:27b	Pathophysiology/Drug Therapy	3	50	31	19	62
gemma3:27b	Pharmaceutics	1	50	18	32	36
gemma3:27b	Pharmaceutics	2	50	19	31	38
gemma3:27b	Pharmaceutics	3	50	18	32	36
gemma3:27b	Pharmacology	1	50	27	23	54
gemma3:27b	Pharmacology	2	50	28	22	56
gemma3:27b	Pharmacology	3	50	27	23	54
gemma3:27b	Physics	1	25	9	16	36
gemma3:27b	Physics	2	25	7	18	28
gemma3:27b	Physics	3	25	9	16	36
gemma3:27b	Practice	1	30	13	17	43.33
gemma3:27b	Practice	2	30	13	17	43.33
gemma3:27b	Practice	3	30	14	16	46.67
gemma3:4b	Biology	1	25	5	20	20
gemma3:4b	Biology	2	25	4	21	16
gemma3:4b	Biology	3	25	5	20	20
gemma3:4b	Chemistry	1	25	4	21	16
gemma3:4b	Chemistry	2	25	3	22	12
gemma3:4b	Chemistry	3	25	5	20	20
gemma3:4b	Hygiene	1	50	17	33	34
gemma3:4b	Hygiene	2	50	15	35	30
gemma3:4b	Hygiene	3	50	16	34	32
gemma3:4b	Laws/Regulations/Ethics	1	40	7	33	17.5
gemma3:4b	Laws/Regulations/Ethics	2	40	7	33	17.5
gemma3:4b	Laws/Regulations/Ethics	3	40	7	33	17.5
gemma3:4b	Pathophysiology/Drug Therapy	1	50	14	36	28
gemma3:4b	Pathophysiology/Drug Therapy	2	50	12	38	24
gemma3:4b	Pathophysiology/Drug Therapy	3	50	14	36	28
gemma3:4b	Pharmaceutics	1	50	9	41	18
gemma3:4b	Pharmaceutics	2	50	8	42	16
gemma3:4b	Pharmaceutics	3	50	11	39	22
gemma3:4b	Pharmacology	1	50	13	37	26
gemma3:4b	Pharmacology	2	50	11	39	22
gemma3:4b	Pharmacology	3	50	14	36	28
gemma3:4b	Physics	1	25	0	25	0
gemma3:4b	Physics	2	25	1	24	4
gemma3:4b	Physics	3	25	0	25	0
gemma3:4b	Practice	1	30	7	23	23.33
gemma3:4b	Practice	2	30	9	21	30
gemma3:4b	Practice	3	30	9	21	30
granite3.2-vision:2b	Biology	1	25	4	21	16
granite3.2-vision:2b	Biology	2	25	3	22	12
granite3.2-vision:2b	Biology	3	25	3	22	12
granite3.2-vision:2b	Chemistry	1	25	6	19	24
granite3.2-vision:2b	Chemistry	2	25	5	20	20
granite3.2-vision:2b	Chemistry	3	25	6	19	24
granite3.2-vision:2b	Hygiene	1	50	3	47	6
granite3.2-vision:2b	Hygiene	2	50	3	47	6
granite3.2-vision:2b	Hygiene	3	50	2	48	4
granite3.2-vision:2b	Laws/Regulations/Ethics	1	40	5	35	12.5
granite3.2-vision:2b	Laws/Regulations/Ethics	2	40	5	35	12.5
granite3.2-vision:2b	Laws/Regulations/Ethics	3	40	5	35	12.5
granite3.2-vision:2b	Pathophysiology/Drug Therapy	1	50	3	47	6
granite3.2-vision:2b	Pathophysiology/Drug Therapy	2	50	3	47	6
granite3.2-vision:2b	Pathophysiology/Drug Therapy	3	50	3	47	6
granite3.2-vision:2b	Pharmaceutics	1	50	9	41	18
granite3.2-vision:2b	Pharmaceutics	2	50	9	41	18
granite3.2-vision:2b	Pharmaceutics	3	50	9	41	18
granite3.2-vision:2b	Pharmacology	1	50	10	40	20
granite3.2-vision:2b	Pharmacology	2	50	10	40	20
granite3.2-vision:2b	Pharmacology	3	50	10	40	20
granite3.2-vision:2b	Physics	1	25	2	23	8
granite3.2-vision:2b	Physics	2	25	2	23	8
granite3.2-vision:2b	Physics	3	25	2	23	8
granite3.2-vision:2b	Practice	1	30	1	29	3.33
granite3.2-vision:2b	Practice	2	30	0	30	0
granite3.2-vision:2b	Practice	3	30	0	30	0
llama3.2-vision:11b	Biology	1	25	1	24	4
llama3.2-vision:11b	Biology	2	25	5	20	20
llama3.2-vision:11b	Biology	3	25	0	25	0
llama3.2-vision:11b	Chemistry	1	25	4	21	16
llama3.2-vision:11b	Chemistry	2	25	2	23	8
llama3.2-vision:11b	Chemistry	3	25	2	23	8
llama3.2-vision:11b	Hygiene	1	50	2	48	4
llama3.2-vision:11b	Hygiene	2	50	4	46	8
llama3.2-vision:11b	Hygiene	3	50	2	48	4
llama3.2-vision:11b	Laws/Regulations/Ethics	1	40	3	37	7.5
llama3.2-vision:11b	Laws/Regulations/Ethics	2	40	1	39	2.5
llama3.2-vision:11b	Laws/Regulations/Ethics	3	40	5	35	12.5
llama3.2-vision:11b	Pathophysiology/Drug Therapy	1	50	9	41	18
llama3.2-vision:11b	Pathophysiology/Drug Therapy	2	50	6	44	12
llama3.2-vision:11b	Pathophysiology/Drug Therapy	3	50	6	44	12
llama3.2-vision:11b	Pharmaceutics	1	50	4	46	8
llama3.2-vision:11b	Pharmaceutics	2	50	1	49	2
llama3.2-vision:11b	Pharmaceutics	3	50	2	48	4
llama3.2-vision:11b	Pharmacology	1	50	4	46	8
llama3.2-vision:11b	Pharmacology	2	50	6	44	12
llama3.2-vision:11b	Pharmacology	3	50	5	45	10
llama3.2-vision:11b	Physics	1	25	1	24	4
llama3.2-vision:11b	Physics	2	25	2	23	8
llama3.2-vision:11b	Physics	3	25	3	22	12
llama3.2-vision:11b	Practice	1	30	2	28	6.67
llama3.2-vision:11b	Practice	2	30	2	28	6.67
llama3.2-vision:11b	Practice	3	30	4	26	13.33
llama3.2-vision:90b	Biology	1	25	13	12	52
llama3.2-vision:90b	Biology	2	25	16	9	64
llama3.2-vision:90b	Biology	3	25	13	12	52
llama3.2-vision:90b	Chemistry	1	25	6	19	24
llama3.2-vision:90b	Chemistry	2	25	5	20	20
llama3.2-vision:90b	Chemistry	3	25	8	17	32
llama3.2-vision:90b	Hygiene	1	50	27	23	54
llama3.2-vision:90b	Hygiene	2	50	25	25	50
llama3.2-vision:90b	Hygiene	3	50	24	26	48
llama3.2-vision:90b	Laws/Regulations/Ethics	1	40	19	21	47.5
llama3.2-vision:90b	Laws/Regulations/Ethics	2	40	20	20	50
llama3.2-vision:90b	Laws/Regulations/Ethics	3	40	21	19	52.5
llama3.2-vision:90b	Pathophysiology/Drug Therapy	1	50	37	13	74
llama3.2-vision:90b	Pathophysiology/Drug Therapy	2	50	38	12	76
llama3.2-vision:90b	Pathophysiology/Drug Therapy	3	50	33	17	66
llama3.2-vision:90b	Pharmaceutics	1	50	26	24	52
llama3.2-vision:90b	Pharmaceutics	2	50	27	23	54
llama3.2-vision:90b	Pharmaceutics	3	50	25	25	50
llama3.2-vision:90b	Pharmacology	1	50	30	20	60
llama3.2-vision:90b	Pharmacology	2	50	30	20	60
llama3.2-vision:90b	Pharmacology	3	50	31	19	62
llama3.2-vision:90b	Physics	1	25	12	13	48
llama3.2-vision:90b	Physics	2	25	9	16	36
llama3.2-vision:90b	Physics	3	25	11	14	44
llama3.2-vision:90b	Practice	1	30	18	12	60
llama3.2-vision:90b	Practice	2	30	15	15	50
llama3.2-vision:90b	Practice	3	30	18	12	60
llama4:16x17b	Biology	1	25	16	9	64
llama4:16x17b	Biology	2	25	15	10	60
llama4:16x17b	Biology	3	25	18	7	72
llama4:16x17b	Chemistry	1	25	10	15	40
llama4:16x17b	Chemistry	2	25	10	15	40
llama4:16x17b	Chemistry	3	25	10	15	40
llama4:16x17b	Hygiene	1	50	30	20	60
llama4:16x17b	Hygiene	2	50	31	19	62
llama4:16x17b	Hygiene	3	50	29	21	58
llama4:16x17b	Laws/Regulations/Ethics	1	40	24	16	60
llama4:16x17b	Laws/Regulations/Ethics	2	40	24	16	60
llama4:16x17b	Laws/Regulations/Ethics	3	40	25	15	62.5
llama4:16x17b	Pathophysiology/Drug Therapy	1	50	40	10	80
llama4:16x17b	Pathophysiology/Drug Therapy	2	50	38	12	76
llama4:16x17b	Pathophysiology/Drug Therapy	3	50	39	11	78
llama4:16x17b	Pharmaceutics	1	50	27	23	54
llama4:16x17b	Pharmaceutics	2	50	26	24	52
llama4:16x17b	Pharmaceutics	3	50	27	23	54
llama4:16x17b	Pharmacology	1	50	32	18	64
llama4:16x17b	Pharmacology	2	50	34	16	68
llama4:16x17b	Pharmacology	3	50	33	17	66
llama4:16x17b	Physics	1	25	12	13	48
llama4:16x17b	Physics	2	25	11	14	44
llama4:16x17b	Physics	3	25	12	13	48
llama4:16x17b	Practice	1	30	17	13	56.67
llama4:16x17b	Practice	2	30	18	12	60
llama4:16x17b	Practice	3	30	17	13	56.67
llava-llama3:8b	Biology	1	25	2	23	8
llava-llama3:8b	Biology	2	25	2	23	8
llava-llama3:8b	Biology	3	25	3	22	12
llava-llama3:8b	Chemistry	1	25	4	21	16
llava-llama3:8b	Chemistry	2	25	5	20	20
llava-llama3:8b	Chemistry	3	25	3	22	12
llava-llama3:8b	Hygiene	1	50	1	49	2
llava-llama3:8b	Hygiene	2	50	2	48	4
llava-llama3:8b	Hygiene	3	50	5	45	10
llava-llama3:8b	Laws/Regulations/Ethics	1	40	3	37	7.5
llava-llama3:8b	Laws/Regulations/Ethics	2	40	2	38	5
llava-llama3:8b	Laws/Regulations/Ethics	3	40	2	38	5
llava-llama3:8b	Pathophysiology/Drug Therapy	1	50	0	50	0
llava-llama3:8b	Pathophysiology/Drug Therapy	2	50	2	48	4
llava-llama3:8b	Pathophysiology/Drug Therapy	3	50	1	49	2
llava-llama3:8b	Pharmaceutics	1	50	2	48	4
llava-llama3:8b	Pharmaceutics	2	50	4	46	8
llava-llama3:8b	Pharmaceutics	3	50	6	44	12
llava-llama3:8b	Pharmacology	1	50	4	46	8
llava-llama3:8b	Pharmacology	2	50	6	44	12
llava-llama3:8b	Pharmacology	3	50	1	49	2
llava-llama3:8b	Physics	1	25	0	25	0
llava-llama3:8b	Physics	2	25	0	25	0
llava-llama3:8b	Physics	3	25	1	24	4
llava-llama3:8b	Practice	1	30	5	25	16.67
llava-llama3:8b	Practice	2	30	2	28	6.67
llava-llama3:8b	Practice	3	30	4	26	13.33
llava-phi3:3.8b	Biology	1	25	3	22	12
llava-phi3:3.8b	Biology	2	25	0	25	0
llava-phi3:3.8b	Biology	3	25	3	22	12
llava-phi3:3.8b	Chemistry	1	25	0	25	0
llava-phi3:3.8b	Chemistry	2	25	4	21	16
llava-phi3:3.8b	Chemistry	3	25	4	21	16
llava-phi3:3.8b	Hygiene	1	50	5	45	10
llava-phi3:3.8b	Hygiene	2	50	4	46	8
llava-phi3:3.8b	Hygiene	3	50	3	47	6
llava-phi3:3.8b	Laws/Regulations/Ethics	1	40	6	34	15
llava-phi3:3.8b	Laws/Regulations/Ethics	2	40	9	31	22.5
llava-phi3:3.8b	Laws/Regulations/Ethics	3	40	3	37	7.5
llava-phi3:3.8b	Pathophysiology/Drug Therapy	1	50	3	47	6
llava-phi3:3.8b	Pathophysiology/Drug Therapy	2	50	1	49	2
llava-phi3:3.8b	Pathophysiology/Drug Therapy	3	50	2	48	4
llava-phi3:3.8b	Pharmaceutics	1	50	3	47	6
llava-phi3:3.8b	Pharmaceutics	2	50	3	47	6
llava-phi3:3.8b	Pharmaceutics	3	50	3	47	6
llava-phi3:3.8b	Pharmacology	1	50	7	43	14
llava-phi3:3.8b	Pharmacology	2	50	5	45	10
llava-phi3:3.8b	Pharmacology	3	50	7	43	14
llava-phi3:3.8b	Physics	1	25	2	23	8
llava-phi3:3.8b	Physics	2	25	3	22	12
llava-phi3:3.8b	Physics	3	25	1	24	4
llava-phi3:3.8b	Practice	1	30	0	30	0
llava-phi3:3.8b	Practice	2	30	2	28	6.67
llava-phi3:3.8b	Practice	3	30	2	28	6.67
llava:13b	Biology	1	25	3	22	12
llava:13b	Biology	2	25	5	20	20
llava:13b	Biology	3	25	1	24	4
llava:13b	Chemistry	1	25	4	21	16
llava:13b	Chemistry	2	25	3	22	12
llava:13b	Chemistry	3	25	3	22	12
llava:13b	Hygiene	1	50	5	45	10
llava:13b	Hygiene	2	50	5	45	10
llava:13b	Hygiene	3	50	6	44	12
llava:13b	Laws/Regulations/Ethics	1	40	7	33	17.5
llava:13b	Laws/Regulations/Ethics	2	40	2	38	5
llava:13b	Laws/Regulations/Ethics	3	40	6	34	15
llava:13b	Pathophysiology/Drug Therapy	1	50	6	44	12
llava:13b	Pathophysiology/Drug Therapy	2	50	5	45	10
llava:13b	Pathophysiology/Drug Therapy	3	50	8	42	16
llava:13b	Pharmaceutics	1	50	5	45	10
llava:13b	Pharmaceutics	2	50	6	44	12
llava:13b	Pharmaceutics	3	50	2	48	4
llava:13b	Pharmacology	1	50	5	45	10
llava:13b	Pharmacology	2	50	5	45	10
llava:13b	Pharmacology	3	50	9	41	18
llava:13b	Physics	1	25	3	22	12
llava:13b	Physics	2	25	2	23	8
llava:13b	Physics	3	25	3	22	12
llava:13b	Practice	1	30	2	28	6.67
llava:13b	Practice	2	30	2	28	6.67
llava:13b	Practice	3	30	5	25	16.67
llava:7b	Biology	1	25	1	24	4
llava:7b	Biology	2	25	2	23	8
llava:7b	Biology	3	25	3	22	12
llava:7b	Chemistry	1	25	2	23	8
llava:7b	Chemistry	2	25	3	22	12
llava:7b	Chemistry	3	25	4	21	16
llava:7b	Hygiene	1	50	2	48	4
llava:7b	Hygiene	2	50	2	48	4
llava:7b	Hygiene	3	50	2	48	4
llava:7b	Laws/Regulations/Ethics	1	40	5	35	12.5
llava:7b	Laws/Regulations/Ethics	2	40	5	35	12.5
llava:7b	Laws/Regulations/Ethics	3	40	6	34	15
llava:7b	Pathophysiology/Drug Therapy	1	50	6	44	12
llava:7b	Pathophysiology/Drug Therapy	2	50	3	47	6
llava:7b	Pathophysiology/Drug Therapy	3	50	2	48	4
llava:7b	Pharmaceutics	1	50	3	47	6
llava:7b	Pharmaceutics	2	50	1	49	2
llava:7b	Pharmaceutics	3	50	2	48	4
llava:7b	Pharmacology	1	50	4	46	8
llava:7b	Pharmacology	2	50	5	45	10
llava:7b	Pharmacology	3	50	4	46	8
llava:7b	Physics	1	25	2	23	8
llava:7b	Physics	2	25	1	24	4
llava:7b	Physics	3	25	2	23	8
llava:7b	Practice	1	30	4	26	13.33
llava:7b	Practice	2	30	1	29	3.33
llava:7b	Practice	3	30	3	27	10
ministral-3:14b	Biology	1	25	16	9	64
ministral-3:14b	Biology	2	25	16	9	64
ministral-3:14b	Biology	3	25	16	9	64
ministral-3:14b	Chemistry	1	25	9	16	36
ministral-3:14b	Chemistry	2	25	9	16	36
ministral-3:14b	Chemistry	3	25	10	15	40
ministral-3:14b	Hygiene	1	50	29	21	58
ministral-3:14b	Hygiene	2	50	29	21	58
ministral-3:14b	Hygiene	3	50	28	22	56
ministral-3:14b	Laws/Regulations/Ethics	1	40	18	22	45
ministral-3:14b	Laws/Regulations/Ethics	2	40	19	21	47.5
ministral-3:14b	Laws/Regulations/Ethics	3	40	18	22	45
ministral-3:14b	Pathophysiology/Drug Therapy	1	50	35	15	70
ministral-3:14b	Pathophysiology/Drug Therapy	2	50	34	16	68
ministral-3:14b	Pathophysiology/Drug Therapy	3	50	35	15	70
ministral-3:14b	Pharmaceutics	1	50	24	26	48
ministral-3:14b	Pharmaceutics	2	50	25	25	50
ministral-3:14b	Pharmaceutics	3	50	24	26	48
ministral-3:14b	Pharmacology	1	50	26	24	52
ministral-3:14b	Pharmacology	2	50	27	23	54
ministral-3:14b	Pharmacology	3	50	27	23	54
ministral-3:14b	Physics	1	25	12	13	48
ministral-3:14b	Physics	2	25	12	13	48
ministral-3:14b	Physics	3	25	13	12	52
ministral-3:14b	Practice	1	30	16	14	53.33
ministral-3:14b	Practice	2	30	16	14	53.33
ministral-3:14b	Practice	3	30	16	14	53.33
ministral-3:3b	Biology	1	25	12	13	48
ministral-3:3b	Biology	2	25	12	13	48
ministral-3:3b	Biology	3	25	13	12	52
ministral-3:3b	Chemistry	1	25	8	17	32
ministral-3:3b	Chemistry	2	25	7	18	28
ministral-3:3b	Chemistry	3	25	7	18	28
ministral-3:3b	Hygiene	1	50	20	30	40
ministral-3:3b	Hygiene	2	50	18	32	36
ministral-3:3b	Hygiene	3	50	20	30	40
ministral-3:3b	Laws/Regulations/Ethics	1	40	12	28	30
ministral-3:3b	Laws/Regulations/Ethics	2	40	12	28	30
ministral-3:3b	Laws/Regulations/Ethics	3	40	15	25	37.5
ministral-3:3b	Pathophysiology/Drug Therapy	1	50	19	31	38
ministral-3:3b	Pathophysiology/Drug Therapy	2	50	16	34	32
ministral-3:3b	Pathophysiology/Drug Therapy	3	50	19	31	38
ministral-3:3b	Pharmaceutics	1	50	23	27	46
ministral-3:3b	Pharmaceutics	2	50	21	29	42
ministral-3:3b	Pharmaceutics	3	50	19	31	38
ministral-3:3b	Pharmacology	1	50	17	33	34
ministral-3:3b	Pharmacology	2	50	19	31	38
ministral-3:3b	Pharmacology	3	50	19	31	38
ministral-3:3b	Physics	1	25	6	19	24
ministral-3:3b	Physics	2	25	9	16	36
ministral-3:3b	Physics	3	25	6	19	24
ministral-3:3b	Practice	1	30	10	20	33.33
ministral-3:3b	Practice	2	30	11	19	36.67
ministral-3:3b	Practice	3	30	10	20	33.33
ministral-3:8b	Biology	1	25	13	12	52
ministral-3:8b	Biology	2	25	14	11	56
ministral-3:8b	Biology	3	25	13	12	52
ministral-3:8b	Chemistry	1	25	7	18	28
ministral-3:8b	Chemistry	2	25	9	16	36
ministral-3:8b	Chemistry	3	25	9	16	36
ministral-3:8b	Hygiene	1	50	21	29	42
ministral-3:8b	Hygiene	2	50	21	29	42
ministral-3:8b	Hygiene	3	50	19	31	38
ministral-3:8b	Laws/Regulations/Ethics	1	40	16	24	40
ministral-3:8b	Laws/Regulations/Ethics	2	40	17	23	42.5
ministral-3:8b	Laws/Regulations/Ethics	3	40	17	23	42.5
ministral-3:8b	Pathophysiology/Drug Therapy	1	50	30	20	60
ministral-3:8b	Pathophysiology/Drug Therapy	2	50	28	22	56
ministral-3:8b	Pathophysiology/Drug Therapy	3	50	29	21	58
ministral-3:8b	Pharmaceutics	1	50	19	31	38
ministral-3:8b	Pharmaceutics	2	50	18	32	36
ministral-3:8b	Pharmaceutics	3	50	20	30	40
ministral-3:8b	Pharmacology	1	50	24	26	48
ministral-3:8b	Pharmacology	2	50	23	27	46
ministral-3:8b	Pharmacology	3	50	24	26	48
ministral-3:8b	Physics	1	25	9	16	36
ministral-3:8b	Physics	2	25	9	16	36
ministral-3:8b	Physics	3	25	9	16	36
ministral-3:8b	Practice	1	30	13	17	43.33
ministral-3:8b	Practice	2	30	12	18	40
ministral-3:8b	Practice	3	30	12	18	40
mistral-small3.1:24b	Biology	1	25	19	6	76
mistral-small3.1:24b	Biology	2	25	17	8	68
mistral-small3.1:24b	Biology	3	25	17	8	68
mistral-small3.1:24b	Chemistry	1	25	7	18	28
mistral-small3.1:24b	Chemistry	2	25	7	18	28
mistral-small3.1:24b	Chemistry	3	25	7	18	28
mistral-small3.1:24b	Hygiene	1	50	31	19	62
mistral-small3.1:24b	Hygiene	2	50	31	19	62
mistral-small3.1:24b	Hygiene	3	50	31	19	62
mistral-small3.1:24b	Laws/Regulations/Ethics	1	40	23	17	57.5
mistral-small3.1:24b	Laws/Regulations/Ethics	2	40	18	22	45
mistral-small3.1:24b	Laws/Regulations/Ethics	3	40	21	19	52.5
mistral-small3.1:24b	Pathophysiology/Drug Therapy	1	50	41	9	82
mistral-small3.1:24b	Pathophysiology/Drug Therapy	2	50	39	11	78
mistral-small3.1:24b	Pathophysiology/Drug Therapy	3	50	37	13	74
mistral-small3.1:24b	Pharmaceutics	1	50	24	26	48
mistral-small3.1:24b	Pharmaceutics	2	50	25	25	50
mistral-small3.1:24b	Pharmaceutics	3	50	25	25	50
mistral-small3.1:24b	Pharmacology	1	50	31	19	62
mistral-small3.1:24b	Pharmacology	2	50	27	23	54
mistral-small3.1:24b	Pharmacology	3	50	30	20	60
mistral-small3.1:24b	Physics	1	25	11	14	44
mistral-small3.1:24b	Physics	2	25	9	16	36
mistral-small3.1:24b	Physics	3	25	9	16	36
mistral-small3.1:24b	Practice	1	30	15	15	50
mistral-small3.1:24b	Practice	2	30	15	15	50
mistral-small3.1:24b	Practice	3	30	14	16	46.67
mistral-small3.2:24b	Biology	1	25	15	10	60
mistral-small3.2:24b	Biology	2	25	15	10	60
mistral-small3.2:24b	Biology	3	25	13	12	52
mistral-small3.2:24b	Chemistry	1	25	8	17	32
mistral-small3.2:24b	Chemistry	2	25	6	19	24
mistral-small3.2:24b	Chemistry	3	25	8	17	32
mistral-small3.2:24b	Hygiene	1	50	28	22	56
mistral-small3.2:24b	Hygiene	2	50	28	22	56
mistral-small3.2:24b	Hygiene	3	50	29	21	58
mistral-small3.2:24b	Laws/Regulations/Ethics	1	40	23	17	57.5
mistral-small3.2:24b	Laws/Regulations/Ethics	2	40	23	17	57.5
mistral-small3.2:24b	Laws/Regulations/Ethics	3	40	22	18	55
mistral-small3.2:24b	Pathophysiology/Drug Therapy	1	50	38	12	76
mistral-small3.2:24b	Pathophysiology/Drug Therapy	2	50	38	12	76
mistral-small3.2:24b	Pathophysiology/Drug Therapy	3	50	38	12	76
mistral-small3.2:24b	Pharmaceutics	1	50	28	22	56
mistral-small3.2:24b	Pharmaceutics	2	50	28	22	56
mistral-small3.2:24b	Pharmaceutics	3	50	28	22	56
mistral-small3.2:24b	Pharmacology	1	50	34	16	68
mistral-small3.2:24b	Pharmacology	2	50	32	18	64
mistral-small3.2:24b	Pharmacology	3	50	33	17	66
mistral-small3.2:24b	Physics	1	25	10	15	40
mistral-small3.2:24b	Physics	2	25	10	15	40
mistral-small3.2:24b	Physics	3	25	10	15	40
mistral-small3.2:24b	Practice	1	30	18	12	60
mistral-small3.2:24b	Practice	2	30	18	12	60
mistral-small3.2:24b	Practice	3	30	18	12	60
moondream:1.8b	Biology	1	25	0	25	0
moondream:1.8b	Biology	2	25	0	25	0
moondream:1.8b	Biology	3	25	0	25	0
moondream:1.8b	Chemistry	1	25	1	24	4
moondream:1.8b	Chemistry	2	25	1	24	4
moondream:1.8b	Chemistry	3	25	1	24	4
moondream:1.8b	Hygiene	1	50	0	50	0
moondream:1.8b	Hygiene	2	50	0	50	0
moondream:1.8b	Hygiene	3	50	0	50	0
moondream:1.8b	Laws/Regulations/Ethics	1	40	0	40	0
moondream:1.8b	Laws/Regulations/Ethics	2	40	0	40	0
moondream:1.8b	Laws/Regulations/Ethics	3	40	0	40	0
moondream:1.8b	Pathophysiology/Drug Therapy	1	50	0	50	0
moondream:1.8b	Pathophysiology/Drug Therapy	2	50	0	50	0
moondream:1.8b	Pathophysiology/Drug Therapy	3	50	1	49	2
moondream:1.8b	Pharmaceutics	1	50	1	49	2
moondream:1.8b	Pharmaceutics	2	50	1	49	2
moondream:1.8b	Pharmaceutics	3	50	1	49	2
moondream:1.8b	Pharmacology	1	50	0	50	0
moondream:1.8b	Pharmacology	2	50	0	50	0
moondream:1.8b	Pharmacology	3	50	0	50	0
moondream:1.8b	Physics	1	25	0	25	0
moondream:1.8b	Physics	2	25	0	25	0
moondream:1.8b	Physics	3	25	0	25	0
moondream:1.8b	Practice	1	30	0	30	0
moondream:1.8b	Practice	2	30	0	30	0
moondream:1.8b	Practice	3	30	0	30	0
qwen2.5vl:32b	Biology	1	25	16	9	64
qwen2.5vl:32b	Biology	2	25	16	9	64
qwen2.5vl:32b	Biology	3	25	14	11	56
qwen2.5vl:32b	Chemistry	1	25	5	20	20
qwen2.5vl:32b	Chemistry	2	25	4	21	16
qwen2.5vl:32b	Chemistry	3	25	5	20	20
qwen2.5vl:32b	Hygiene	1	50	32	18	64
qwen2.5vl:32b	Hygiene	2	50	31	19	62
qwen2.5vl:32b	Hygiene	3	50	31	19	62
qwen2.5vl:32b	Laws/Regulations/Ethics	1	40	18	22	45
qwen2.5vl:32b	Laws/Regulations/Ethics	2	40	19	21	47.5
qwen2.5vl:32b	Laws/Regulations/Ethics	3	40	18	22	45
qwen2.5vl:32b	Pathophysiology/Drug Therapy	1	50	35	15	70
qwen2.5vl:32b	Pathophysiology/Drug Therapy	2	50	34	16	68
qwen2.5vl:32b	Pathophysiology/Drug Therapy	3	50	34	16	68
qwen2.5vl:32b	Pharmaceutics	1	50	19	31	38
qwen2.5vl:32b	Pharmaceutics	2	50	21	29	42
qwen2.5vl:32b	Pharmaceutics	3	50	16	34	32
qwen2.5vl:32b	Pharmacology	1	50	32	18	64
qwen2.5vl:32b	Pharmacology	2	50	32	18	64
qwen2.5vl:32b	Pharmacology	3	50	32	18	64
qwen2.5vl:32b	Physics	1	25	13	12	52
qwen2.5vl:32b	Physics	2	25	13	12	52
qwen2.5vl:32b	Physics	3	25	12	13	48
qwen2.5vl:32b	Practice	1	30	14	16	46.67
qwen2.5vl:32b	Practice	2	30	14	16	46.67
qwen2.5vl:32b	Practice	3	30	14	16	46.67
qwen2.5vl:3b	Biology	1	25	11	14	44
qwen2.5vl:3b	Biology	2	25	10	15	40
qwen2.5vl:3b	Biology	3	25	10	15	40
qwen2.5vl:3b	Chemistry	1	25	1	24	4
qwen2.5vl:3b	Chemistry	2	25	0	25	0
qwen2.5vl:3b	Chemistry	3	25	0	25	0
qwen2.5vl:3b	Hygiene	1	50	11	39	22
qwen2.5vl:3b	Hygiene	2	50	16	34	32
qwen2.5vl:3b	Hygiene	3	50	14	36	28
qwen2.5vl:3b	Laws/Regulations/Ethics	1	40	8	32	20
qwen2.5vl:3b	Laws/Regulations/Ethics	2	40	8	32	20
qwen2.5vl:3b	Laws/Regulations/Ethics	3	40	8	32	20
qwen2.5vl:3b	Pathophysiology/Drug Therapy	1	50	13	37	26
qwen2.5vl:3b	Pathophysiology/Drug Therapy	2	50	14	36	28
qwen2.5vl:3b	Pathophysiology/Drug Therapy	3	50	13	37	26
qwen2.5vl:3b	Pharmaceutics	1	50	5	45	10
qwen2.5vl:3b	Pharmaceutics	2	50	6	44	12
qwen2.5vl:3b	Pharmaceutics	3	50	6	44	12
qwen2.5vl:3b	Pharmacology	1	50	6	44	12
qwen2.5vl:3b	Pharmacology	2	50	6	44	12
qwen2.5vl:3b	Pharmacology	3	50	8	42	16
qwen2.5vl:3b	Physics	1	25	3	22	12
qwen2.5vl:3b	Physics	2	25	4	21	16
qwen2.5vl:3b	Physics	3	25	2	23	8
qwen2.5vl:3b	Practice	1	30	5	25	16.67
qwen2.5vl:3b	Practice	2	30	5	25	16.67
qwen2.5vl:3b	Practice	3	30	5	25	16.67
qwen2.5vl:72b	Biology	1	25	20	5	80
qwen2.5vl:72b	Biology	2	25	19	6	76
qwen2.5vl:72b	Biology	3	25	20	5	80
qwen2.5vl:72b	Chemistry	1	25	10	15	40
qwen2.5vl:72b	Chemistry	2	25	9	16	36
qwen2.5vl:72b	Chemistry	3	25	11	14	44
qwen2.5vl:72b	Hygiene	1	50	31	19	62
qwen2.5vl:72b	Hygiene	2	50	29	21	58
qwen2.5vl:72b	Hygiene	3	50	26	24	52
qwen2.5vl:72b	Laws/Regulations/Ethics	1	40	22	18	55
qwen2.5vl:72b	Laws/Regulations/Ethics	2	40	23	17	57.5
qwen2.5vl:72b	Laws/Regulations/Ethics	3	40	23	17	57.5
qwen2.5vl:72b	Pathophysiology/Drug Therapy	1	50	40	10	80
qwen2.5vl:72b	Pathophysiology/Drug Therapy	2	50	40	10	80
qwen2.5vl:72b	Pathophysiology/Drug Therapy	3	50	40	10	80
qwen2.5vl:72b	Pharmaceutics	1	50	27	23	54
qwen2.5vl:72b	Pharmaceutics	2	50	29	21	58
qwen2.5vl:72b	Pharmaceutics	3	50	29	21	58
qwen2.5vl:72b	Pharmacology	1	50	36	14	72
qwen2.5vl:72b	Pharmacology	2	50	33	17	66
qwen2.5vl:72b	Pharmacology	3	50	35	15	70
qwen2.5vl:72b	Physics	1	25	13	12	52
qwen2.5vl:72b	Physics	2	25	14	11	56
qwen2.5vl:72b	Physics	3	25	12	13	48
qwen2.5vl:72b	Practice	1	30	16	14	53.33
qwen2.5vl:72b	Practice	2	30	18	12	60
qwen2.5vl:72b	Practice	3	30	18	12	60
qwen2.5vl:7b	Biology	1	25	9	16	36
qwen2.5vl:7b	Biology	2	25	8	17	32
qwen2.5vl:7b	Biology	3	25	8	17	32
qwen2.5vl:7b	Chemistry	1	25	4	21	16
qwen2.5vl:7b	Chemistry	2	25	2	23	8
qwen2.5vl:7b	Chemistry	3	25	3	22	12
qwen2.5vl:7b	Hygiene	1	50	11	39	22
qwen2.5vl:7b	Hygiene	2	50	9	41	18
qwen2.5vl:7b	Hygiene	3	50	13	37	26
qwen2.5vl:7b	Laws/Regulations/Ethics	1	40	11	29	27.5
qwen2.5vl:7b	Laws/Regulations/Ethics	2	40	12	28	30
qwen2.5vl:7b	Laws/Regulations/Ethics	3	40	12	28	30
qwen2.5vl:7b	Pathophysiology/Drug Therapy	1	50	21	29	42
qwen2.5vl:7b	Pathophysiology/Drug Therapy	2	50	20	30	40
qwen2.5vl:7b	Pathophysiology/Drug Therapy	3	50	23	27	46
qwen2.5vl:7b	Pharmaceutics	1	50	11	39	22
qwen2.5vl:7b	Pharmaceutics	2	50	14	36	28
qwen2.5vl:7b	Pharmaceutics	3	50	14	36	28
qwen2.5vl:7b	Pharmacology	1	50	12	38	24
qwen2.5vl:7b	Pharmacology	2	50	12	38	24
qwen2.5vl:7b	Pharmacology	3	50	11	39	22
qwen2.5vl:7b	Physics	1	25	2	23	8
qwen2.5vl:7b	Physics	2	25	3	22	12
qwen2.5vl:7b	Physics	3	25	3	22	12
qwen2.5vl:7b	Practice	1	30	7	23	23.33
qwen2.5vl:7b	Practice	2	30	7	23	23.33
qwen2.5vl:7b	Practice	3	30	8	22	26.67
translategemma:12b	Biology	1	25	12	13	48
translategemma:12b	Biology	2	25	11	14	44
translategemma:12b	Biology	3	25	13	12	52
translategemma:12b	Chemistry	1	25	7	18	28
translategemma:12b	Chemistry	2	25	6	19	24
translategemma:12b	Chemistry	3	25	7	18	28
translategemma:12b	Hygiene	1	50	24	26	48
translategemma:12b	Hygiene	2	50	24	26	48
translategemma:12b	Hygiene	3	50	24	26	48
translategemma:12b	Laws/Regulations/Ethics	1	40	18	22	45
translategemma:12b	Laws/Regulations/Ethics	2	40	17	23	42.5
translategemma:12b	Laws/Regulations/Ethics	3	40	18	22	45
translategemma:12b	Pathophysiology/Drug Therapy	1	50	29	21	58
translategemma:12b	Pathophysiology/Drug Therapy	2	50	25	25	50
translategemma:12b	Pathophysiology/Drug Therapy	3	50	27	23	54
translategemma:12b	Pharmaceutics	1	50	15	35	30
translategemma:12b	Pharmaceutics	2	50	17	33	34
translategemma:12b	Pharmaceutics	3	50	17	33	34
translategemma:12b	Pharmacology	1	50	28	22	56
translategemma:12b	Pharmacology	2	50	28	22	56
translategemma:12b	Pharmacology	3	50	28	22	56
translategemma:12b	Physics	1	25	9	16	36
translategemma:12b	Physics	2	25	8	17	32
translategemma:12b	Physics	3	25	8	17	32
translategemma:12b	Practice	1	30	13	17	43.33
translategemma:12b	Practice	2	30	14	16	46.67
translategemma:12b	Practice	3	30	12	18	40
translategemma:27b	Biology	1	25	18	7	72
translategemma:27b	Biology	2	25	18	7	72
translategemma:27b	Biology	3	25	19	6	76
translategemma:27b	Chemistry	1	25	6	19	24
translategemma:27b	Chemistry	2	25	10	15	40
translategemma:27b	Chemistry	3	25	7	18	28
translategemma:27b	Hygiene	1	50	32	18	64
translategemma:27b	Hygiene	2	50	33	17	66
translategemma:27b	Hygiene	3	50	32	18	64
translategemma:27b	Laws/Regulations/Ethics	1	40	13	27	32.5
translategemma:27b	Laws/Regulations/Ethics	2	40	16	24	40
translategemma:27b	Laws/Regulations/Ethics	3	40	16	24	40
translategemma:27b	Pathophysiology/Drug Therapy	1	50	31	19	62
translategemma:27b	Pathophysiology/Drug Therapy	2	50	34	16	68
translategemma:27b	Pathophysiology/Drug Therapy	3	50	33	17	66
translategemma:27b	Pharmaceutics	1	50	18	32	36
translategemma:27b	Pharmaceutics	2	50	18	32	36
translategemma:27b	Pharmaceutics	3	50	18	32	36
translategemma:27b	Pharmacology	1	50	30	20	60
translategemma:27b	Pharmacology	2	50	29	21	58
translategemma:27b	Pharmacology	3	50	30	20	60
translategemma:27b	Physics	1	25	9	16	36
translategemma:27b	Physics	2	25	9	16	36
translategemma:27b	Physics	3	25	8	17	32
translategemma:27b	Practice	1	30	13	17	43.33
translategemma:27b	Practice	2	30	13	17	43.33
translategemma:27b	Practice	3	30	15	15	50
translategemma:4b	Biology	1	25	3	22	12
translategemma:4b	Biology	2	25	3	22	12
translategemma:4b	Biology	3	25	3	22	12
translategemma:4b	Chemistry	1	25	3	22	12
translategemma:4b	Chemistry	2	25	2	23	8
translategemma:4b	Chemistry	3	25	2	23	8
translategemma:4b	Hygiene	1	50	16	34	32
translategemma:4b	Hygiene	2	50	17	33	34
translategemma:4b	Hygiene	3	50	14	36	28
translategemma:4b	Laws/Regulations/Ethics	1	40	11	29	27.5
translategemma:4b	Laws/Regulations/Ethics	2	40	10	30	25
translategemma:4b	Laws/Regulations/Ethics	3	40	11	29	27.5
translategemma:4b	Pathophysiology/Drug Therapy	1	50	9	41	18
translategemma:4b	Pathophysiology/Drug Therapy	2	50	9	41	18
translategemma:4b	Pathophysiology/Drug Therapy	3	50	10	40	20
translategemma:4b	Pharmaceutics	1	50	8	42	16
translategemma:4b	Pharmaceutics	2	50	8	42	16
translategemma:4b	Pharmaceutics	3	50	7	43	14
translategemma:4b	Pharmacology	1	50	11	39	22
translategemma:4b	Pharmacology	2	50	9	41	18
translategemma:4b	Pharmacology	3	50	14	36	28
translategemma:4b	Physics	1	25	2	23	8
translategemma:4b	Physics	2	25	3	22	12
translategemma:4b	Physics	3	25	1	24	4
translategemma:4b	Practice	1	30	8	22	26.67
translategemma:4b	Practice	2	30	9	21	30
translategemma:4b	Practice	3	30	10	20	33.33
